# Supplementary material for: PEPATAC: an optimized pipeline for ATAC-seq data analysis with serial alignments
Source: PubMed Central journal article supplement — NAR Genom Bioinform. 2021 Nov 23;3(4):lqab101. doi: 10.1093/nargab/lqab101 (PMC8632735; doi:10.1093/nargab/lqab101), 2021-11-23
Supplement: lqab101_supplemental_file.pdf [file lqab101_supplemental_file.pdf]

## Supplemental figures

|                            | trimming                                   | read QC       | mapping                                   | deduplication                    | filtering                                 | signal generation       | peak calling                                    | QC               | downstream analyses                                                             |
|----------------------------|--------------------------------------------|---------------|-------------------------------------------|----------------------------------|-------------------------------------------|-------------------------|-------------------------------------------------|------------------|---------------------------------------------------------------------------------|
| <b>AIAP</b>                | cutadapt                                   | FastQC        | bwa                                       | picard                           | samtools methylQA                         | UCSC tools              | MACS2                                           | MultiQC          | DESeq2                                                                          |
| <b>ATAC2GRN</b>            | NA                                         | NA            | bowtie2                                   | NA                               | NA                                        | NA                      | HOMER                                           | NA               | HINT                                                                            |
| <b>ATAC-pipe</b>           | custom python                              | custom python | bowtie2                                   | picard                           | samtools                                  | UCSC tools              | MACS2                                           | custom python    | CENTPEDE<br>DESeq2<br>HOMER<br>HINT-ATAC<br>HOMER<br>DeepTools<br>custom python |
| <b>ATACProc</b>            | trim_adapters.py*                          | NA            | bowtie2                                   | picard<br>DeepTools              | samtools<br>DeepTools                     | UCSC tools<br>DeepTools | MACS2                                           | ataqv            |                                                                                 |
| <b>CIPHER</b>              | BBDUK                                      | FastQC        | bbmap<br>bowtie2<br>bwa<br>hisat2<br>star | NA                               | samtools                                  | DeepTools               | MACS2<br>epic                                   | MultiQC          | NA                                                                              |
| <b>ENCODE</b>              | trimmomatic<br>cutadapt                    | NA            | bowtie2<br>bwa                            | picard                           | samtools<br>bedtools                      | UCSC tools              | MACS2                                           | custom code      | IDR                                                                             |
| <b>esATAC</b>              | AdapterRemoval                             | NA            | Rbowtie2                                  | custom R                         | NA                                        | custom R                | F-Seq                                           | custom R         | ChIPpeakAnno                                                                    |
| <b>GUAVA</b>               | cutadapt                                   | FastQC        | bowtie2                                   | NA                               | NA                                        | UCSC tools              | MACS2                                           | custom code      | DESeq2<br>ChIPpeakAnno                                                          |
| <b>I-ATAC</b>              | trimmomatic                                | FastQC        | bwa                                       | picard                           | NA                                        | NA                      | MACS2                                           | NA               | NA                                                                              |
| <b>nfcore/atacseq</b>      | Trim Galore!†                              | FastQC        | bwa                                       | picard                           | samtools<br>bedtools<br>pysam<br>bamtools | bedtools<br>UCSC tools  | MACS2                                           | ataqv            | DESeq2                                                                          |
| <b>PEPATAC</b>             | skewer<br>trimmomatic<br>trim_adapters.py‡ | FastQC        | bowtie2<br>bwa                            | samblaster<br>picard<br>samtools | samtools<br>bedtools                      | custom python           | MACS2<br>F-Seq2<br>Genrich<br>HMMRATAC<br>HOMER | custom code      | HOMER<br>custom code                                                            |
| <b>pyflow-ATAC-seq</b>     | atactk§                                    | FastQC        | bowtie2                                   | samblaster                       | samtools                                  | DeepTools               | MACS2                                           | ataqv<br>MultiQC | CENTPEDE                                                                        |
| <b>seq2science</b>         | Trim Galore!†                              | FastQC        | bowtie2<br>bwa<br>hisat2<br>star          | picard                           | samtools                                  | DeepTools               | MACS2<br>Genrich<br>HMMRATAC                    | MultiQC          | custom code                                                                     |
| <b>snakePipes ATAC-seq</b> | cutadapt                                   | FastQC        | bowtie2                                   | sambamba                         | samtools                                  | DeepTools               | MACS2<br>Genrich<br>HMMRATAC                    | MultiQC          | CSAW                                                                            |
| <b>Tobias Rausch</b>       | cutadapt                                   | FastQC        | bowtie2                                   | biobambam2                       | samtools                                  | Alfred                  | MACS2                                           | Alfred           | HOMER<br>custom R tutorial                                                      |
| <b>OVERALL</b>             | cutadapt                                   | FastQC        | bowtie2                                   | picard                           | samtools                                  | UCSC tools              | MACS2                                           | MultiQC          | HOMER<br>DESeq2                                                                 |

Fig. S1: ATAC-seq pipelines universally require several common bioinformatic tools. While all pipelines require a number of common bioinformatic tools, PEPATAC offers the greatest flexibility and includes a number of the most popular tools.

## Supplemental files

### Supplemental\_file\_1.csv

Supplemental\_file\_1.csv is the PEP-formatted sample table for the primary dataset. Samples are defined by protocol, whether standard, fast, or omni, and include accession numbers for access through the Gene Expression Omnibus (63).

### Supplemental\_file\_2.xlsx

Supplemental\_file\_2.xlsx contains two sheets. The “jaccard\_similarities” sheet includes tables representing the results of `bedtools intersect` between each independent peak caller software for 1) the PEPATAC derived consensus peak set, and 2) for an individual sample (SRR5210416) between each peak caller. This sheet also includes the average jaccard statistic for each peak caller. The “blacklisted\_regions” sheet compares the number of peaks generated by each peak caller that overlap blacklisted regions (35).

### Supplemental\_file\_3.xlsx

Supplemental\_file\_3.xlsx includes three sheets for a standard ATAC (SRR5427804), fast ATAC (SRR2920492), and omni ATAC (SRR5427806) sample that has been run through PEPATAC with 1) no prealignments, 2) mitochondrial

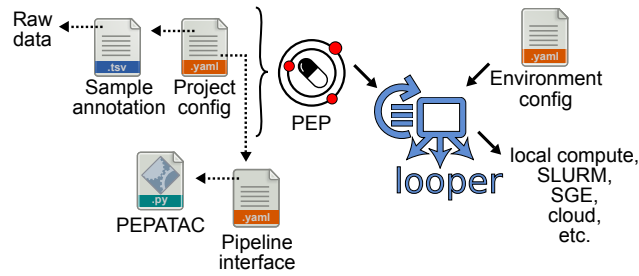

**Fig. S2: Deploying PEPATAC across multiple samples using loopier.** The PEPATAC pipeline can be easily run across multiple samples in any computing environment using loopier.

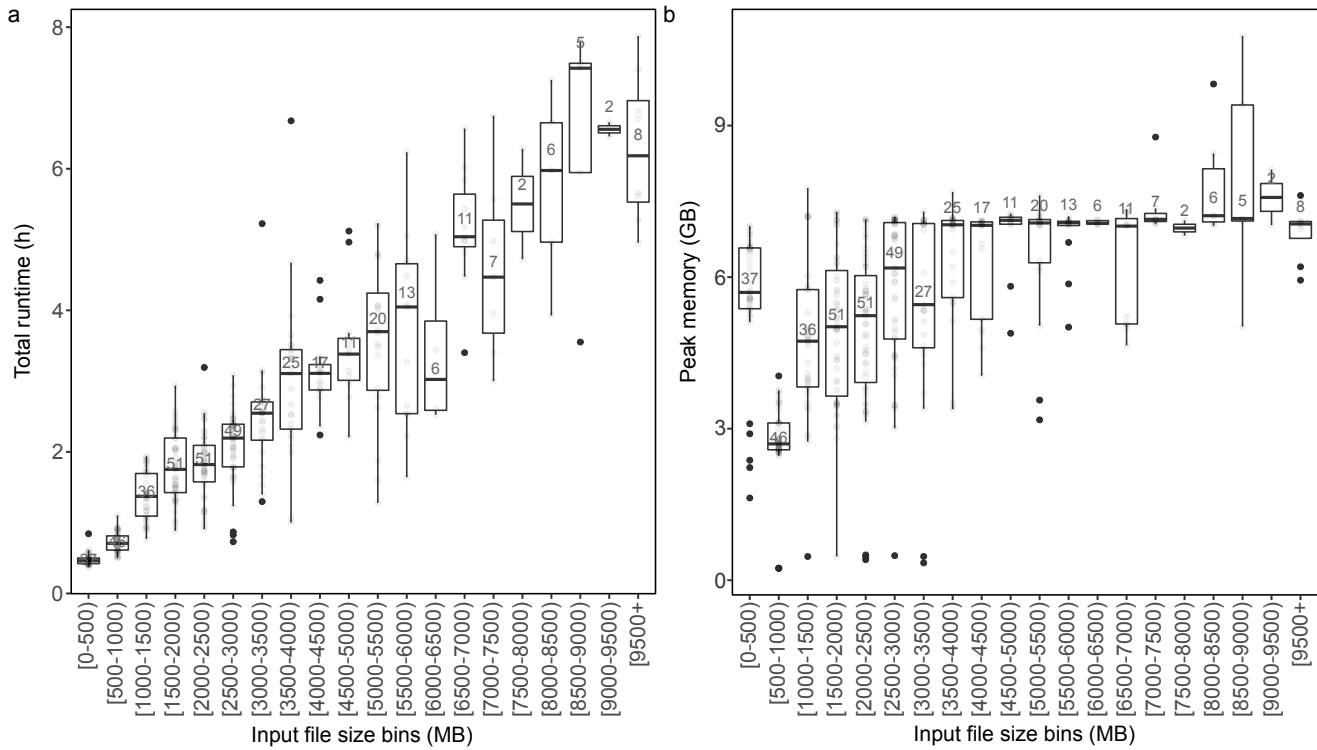

**Fig. S3: PEPATAC is computational efficient.** (a) Pipeline runtime scales linearly with input file size. (b) Pipeline memory use peaks between 5-9GB.

prealignment (rCRSd: the revised Cambridge Reference Sequence doubled genome), and 3) mitochondrial, human repeats, and rDNA prealignments. In each sheet, for the highest scoring peaks, individual peak fasta sequences (included) were aligned with BLAST (60) and top scoring annotations recorded. If the peak overlaps a known blacklisted region (35), this is also marked.

#### Supplemental\_file\_4.csv

Supplemental\_file\_4.csv is the PEP-formatted sample table for the performance testing dataset. Accession numbers for file access through the Gene Expression Omnibus (63) are included for each sample.

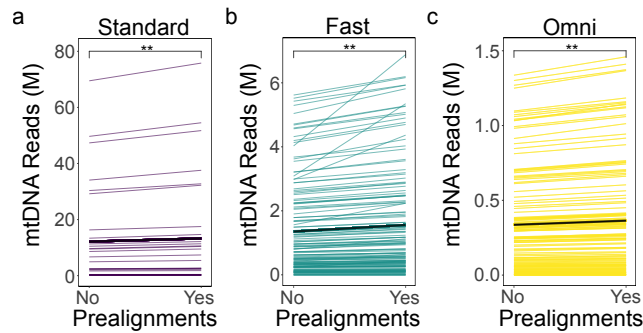

**Fig. S4: Prealignment increases mtDNA alignment.** Within Standard (a), Fast (b), and Omni (c) ATAC-seq library preparation protocols, every sample shows increased mtDNA alignment when utilizing prealignments (The gray lines represent the mean increase within each protocol. \*\* =  $p < 0.001$ ;  $t$ -test ( $\mu = 0$ ) with Benjamini-Hochberg correction.)

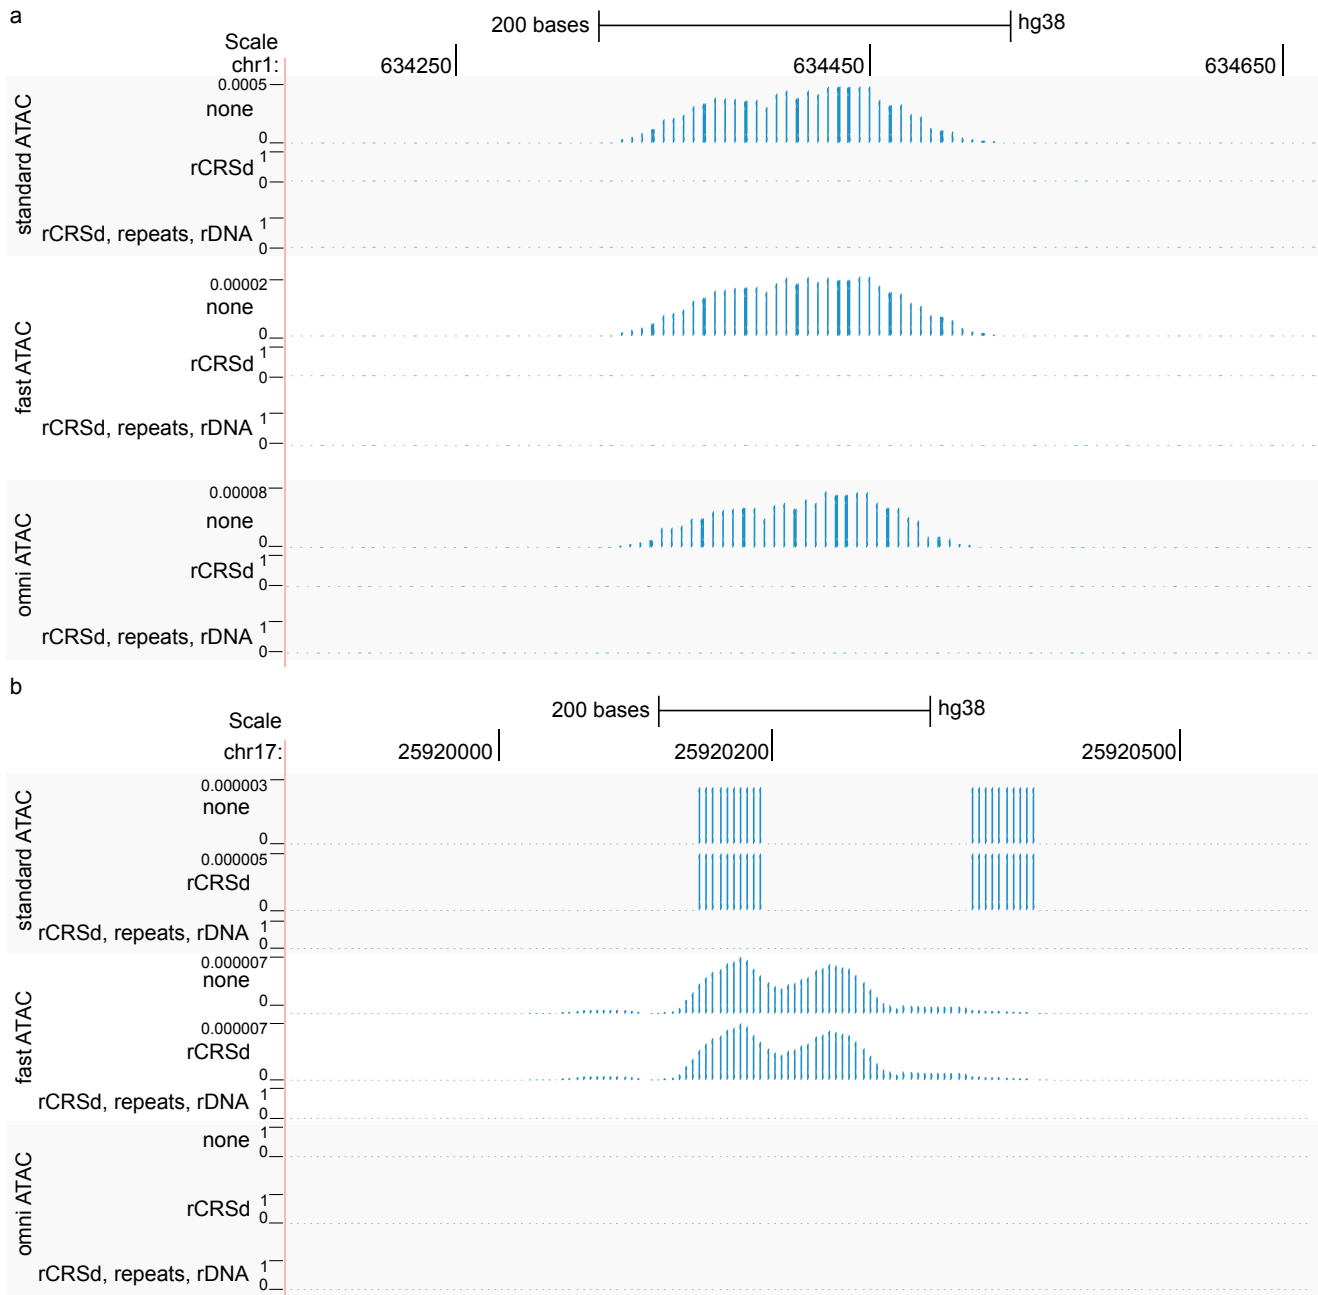

**Fig. S5: Prealignment (and improved ATAC-seq library preparation protocols) successfully deplete signal from NuMTs, repeat regions, and high signal regions.** (a) Even where improved library preparation protocol leads to a NuMT annotated peak, prealignment successfully removes the spurious signal. (b) Both omni ATAC and prealignment to mitochondria and repeats and ribosomal sequence successfully depletes a spurious signal.

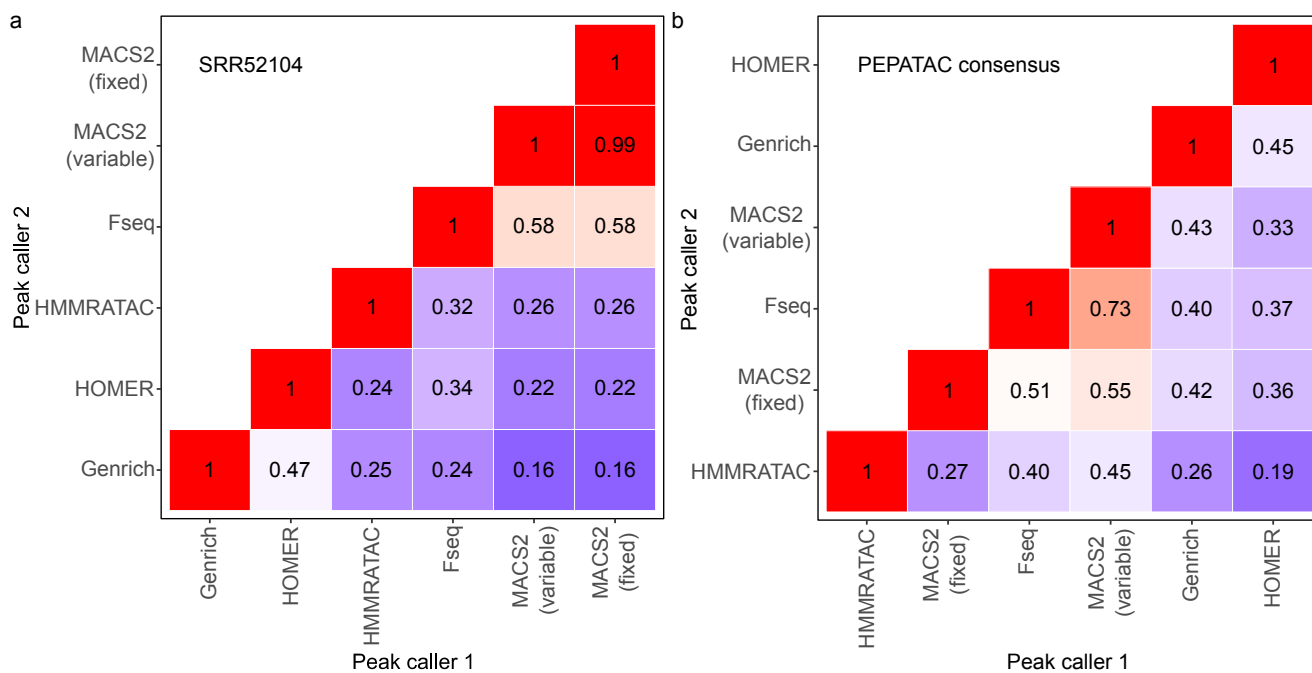

**Fig. S6: Peaks are comparatively dissimilar between the five optional peak callers.** (a) For a single sample, MACS2 derived peaks, both with fixed and variable width peaks, are the most similar to Fseq called peaks. Genrich and HMMRATAC are the most unique among peak callers. (b) After PEPATAC consensus peak generation, HMMRATAC becomes even more dissimilar from the results derived from alternative peak callers.

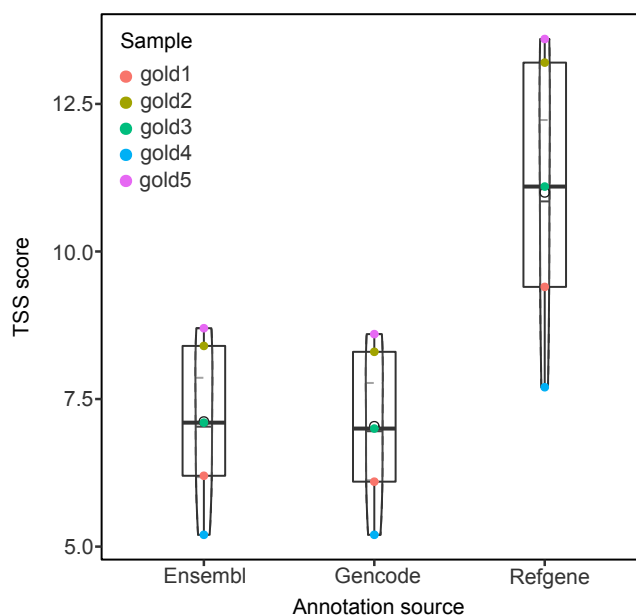

**Fig. S7: The TSS enrichment score is dependent on the annotation source.** Refgene TSS annotations, which include the predominant TSS annotation only, produces the highest TSS enrichment score.

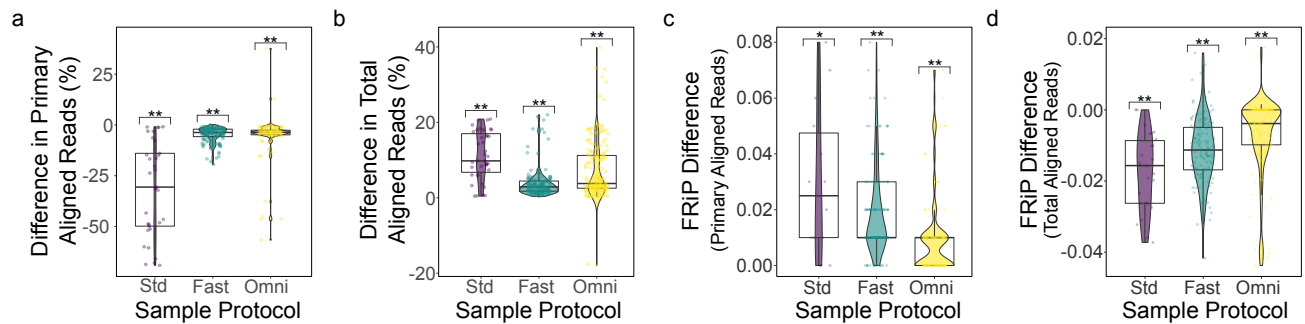

**Fig. S8: Prealignment changes the relationship between primary genome and total aligned reads and the fraction of reads in peaks (FRiP) is dependent on mapping strategy.** (a) The number of primary, nuclear genome mapped reads is reduced when using prealignments. (b) However, the total number of mapped reads is increased with prealignments due to more specific read mapping. (c) The FRiP is increased with prealignments when using primary, nuclear genome mapped reads as the denominator. (d) In contrast, when using the total mapped reads the FRiP is reduced when using prealignments due to a larger mapped read pool in the denominator (\* =  $p < 0.01$ ; \*\* =  $p < 0.001$ ; t-test ( $\mu = 0$ ) with Benjamini-Hochberg correction).
